# Supplementary material for: HIV serostatus knowledge and serostatus disclosure with the most recent anal intercourse partner in a European MSM sample recruited in 13 cities: results from the Sialon-II study
Source: Springer Nature journal article supplement (doi:10.1186/s12879-017-2814-x), 2017-11-24
Supplement: MOESM1 [file 15253966]

***This questionnaire is completely anonymous. Please answer all questions.***

***To answer, put an X inside the box provided .***

***If you want to change your answer, simply fill in the wrong box completely and cross the correct one.***

***When asked for a number, put one digit in each space: |\_9\_|\_9\_|***

***In the free text fields, use preferably print.***

**1. Which year were you born?**

19 |\_\_|\_\_|

**2. Which country were you born in?**

[In the study country]  <sub>1</sub>

Other (specify) \_\_\_\_\_

**2a. Which country was your mother born in?**

[Same country as study]  <sub>1</sub>

Other (specify) \_\_\_\_\_

**2b. Which country was your father born in?**

[Same country as study]  <sub>1</sub>

Other (specify) \_\_\_\_\_

**3. Which country do you currently live in?**

[In the study country]  <sub>1</sub>

Other (specify) \_\_\_\_\_

**4. Where do you live?**

- [In the study city]  1
- Within 100 km of [the study city]  2
- I am a tourist/visitor/commuter from within the same country  3
- I am a tourist/visitor from another country  4

**5. What is your highest educational qualification?**

- No qualification  1
- CSE  2
- ‘O’ level  3
- ‘A’ levels  4
- Higher education (below degree level)  5
- University degree (e.g. Bachelors, Masters, PhD)  6
- I prefer not to answer  9

**6a. During the last three months, how many times did you visit the following types of venues?**

*(Please refer to the list provided to see which venues are included under each type. Please answer each item. If you are not sure, give an estimation.)*

- |    |                      |       |       |
|----|----------------------|-------|-------|
| a. | Gay disco/dance club | _ _ _ | times |
| b. | Gay café             | _ _ _ | times |
| c. | Gay bar              | _ _ _ | times |
| d. | Gay sauna            | _ _ _ | times |
| e. | Gay Sex club         | _ _ _ | times |
| f. | Gay Sex shop         | _ _ _ | times |

**6b. During the last three months, how many times did you visit this particular venue where we are right now. (If you are not sure, please give an estimation.)**

|\_|\_|\_| times

**7. Thinking about all the people who know you (including family, friends and work or study colleagues), what proportion know that you are attracted to men?**

- None  1
- Few  2
- Less than half  3
- More than half  4
- All or almost all  5
- I prefer not to answer  9

**8. In your experience, what is most people's attitude towards gays or bisexuals in the following contexts? (please answer each item)**

|    |                       | Very<br>negative           | Negative                   | Neither negative<br>nor positive | Positive                   | Very<br>positive           |
|----|-----------------------|----------------------------|----------------------------|----------------------------------|----------------------------|----------------------------|
| a. | Work/School           | <input type="checkbox"/> 1 | <input type="checkbox"/> 2 | <input type="checkbox"/> 3       | <input type="checkbox"/> 4 | <input type="checkbox"/> 5 |
| b. | Parents               | <input type="checkbox"/> 1 | <input type="checkbox"/> 2 | <input type="checkbox"/> 3       | <input type="checkbox"/> 4 | <input type="checkbox"/> 5 |
| c. | Friends/Acquaintances | <input type="checkbox"/> 1 | <input type="checkbox"/> 2 | <input type="checkbox"/> 3       | <input type="checkbox"/> 4 | <input type="checkbox"/> 5 |

**9. Do you know where you can go if you wish to receive an HIV test?**

Yes  1

No  2

I prefer not to answer  9

***From this point onwards we would like you to focus on the past 12 months.***

**10. In the last 12 months, have you been given condoms - e.g. through an outreach service, drop-in center or sexual health clinic (excluding this SIALON II project)?**

Yes  1  
 No  2      ➔ *Go to question 12*  
 I prefer not to answer  9      ➔ *Go to question 12*

**11. If you have been given condoms in the last 12 months, where did you get them from (excluding this SIALON II project)?**

|                                                                  | Yes                        | No                         | I prefer not to answer     |
|------------------------------------------------------------------|----------------------------|----------------------------|----------------------------|
| a. At drop-in centre, sexual-health clinic, health care facility | <input type="checkbox"/> 1 | <input type="checkbox"/> 2 | <input type="checkbox"/> 9 |
| b. By an outreach service/ gay/HIV/other association             | <input type="checkbox"/> 1 | <input type="checkbox"/> 2 | <input type="checkbox"/> 9 |
| c. At saunas, clubs, discos, bars                                | <input type="checkbox"/> 1 | <input type="checkbox"/> 2 | <input type="checkbox"/> 9 |
| d. At other type venues or settings                              | <input type="checkbox"/> 1 | <input type="checkbox"/> 2 | <input type="checkbox"/> 9 |

**12. In the last 12 months, have you been tested for sexually transmitted infections other than HIV?**

Yes  1  
 No  2      ➔ *Go to question 14*  
 I prefer not to answer  9      ➔ *Go to question 14*

**13. In the last 12 months, have you been diagnosed with the following (please answer each item):**

|                                   | Yes                        | No                         | I do not know              | I prefer not to answer     |
|-----------------------------------|----------------------------|----------------------------|----------------------------|----------------------------|
| a. Syphilis                       | <input type="checkbox"/> 1 | <input type="checkbox"/> 2 | <input type="checkbox"/> 8 | <input type="checkbox"/> 9 |
| b. Gonorrhoea                     | <input type="checkbox"/> 1 | <input type="checkbox"/> 2 | <input type="checkbox"/> 8 | <input type="checkbox"/> 9 |
| c. Chlamydia                      | <input type="checkbox"/> 1 | <input type="checkbox"/> 2 | <input type="checkbox"/> 8 | <input type="checkbox"/> 9 |
| d. Anogenital Warts               | <input type="checkbox"/> 1 | <input type="checkbox"/> 2 | <input type="checkbox"/> 8 | <input type="checkbox"/> 9 |
| e. Genital herpes                 | <input type="checkbox"/> 1 | <input type="checkbox"/> 2 | <input type="checkbox"/> 8 | <input type="checkbox"/> 9 |
| f. Lymphogranuloma venereum (LGV) | <input type="checkbox"/> 1 | <input type="checkbox"/> 2 | <input type="checkbox"/> 8 | <input type="checkbox"/> 9 |
| g. Urethral outflow/itching       | <input type="checkbox"/> 1 | <input type="checkbox"/> 2 | <input type="checkbox"/> 8 | <input type="checkbox"/> 9 |
| h. Hepatitis B                    | <input type="checkbox"/> 1 | <input type="checkbox"/> 2 | <input type="checkbox"/> 8 | <input type="checkbox"/> 9 |
| i. Hepatitis C                    | <input type="checkbox"/> 1 | <input type="checkbox"/> 2 | <input type="checkbox"/> 8 | <input type="checkbox"/> 9 |

**14. Have you been tested for HIV in the last 12 months?**

- Yes  1  
 No  2 ➔ *Go to question 16*  
 I prefer not to answer  9 ➔ *Go to question 16*

**15. If you had an HIV test in the last 12 months, did you receive the result of that test?**

- Yes  1  
 No  2  
 I prefer not to answer  9

***From this point onwards we would like you to focus on the last 6 months and your male non-steady partners.***

***“Non-steady partners” refer to men you have had sex with once only, and men you have sex with more than once but who you don’t think of as a steady partner (including one night stands, anonymous and casual partners, sex buddies).***

***By “sex” we mean any kind of sex involving physical contact with another person, including oral sex and mutual masturbation.***

**16. In the last 6 months, how many male *non-steady* partners have you had sex with? (If you are not sure, please give an estimation.)**

- Number of male non-steady partners (0 if none) |\_\_|\_\_|\_\_|  
 I prefer not to answer  999

**17. In the last 6 months, how many male *non-steady* partners have you had anal intercourse with? (If you are not sure, please give an estimation.)**

- Number of male non-steady partners (0 if none) |\_\_|\_\_|\_\_|  
 I prefer not to answer  999

**18. In the last 6 months, how many male *non-steady* partners have you had unprotected (without condom) anal intercourse with? (If you are not sure, please give an estimation.)**

- Number of male non-steady partners (0 if none) |\_\_|\_\_|\_\_|  
 I prefer not to answer  999

**19. How many of those you had unprotected (without condom) anal intercourse with were:**

- HIV positive (0 if none) |\_\_|\_\_|\_\_|  
 With unknown HIV status (0 if none) |\_\_|\_\_|\_\_|  
 HIV negative (0 if none) |\_\_|\_\_|\_\_|  
 I prefer not to answer  999

**From this point onwards we would like you to focus on the last 6 months and your male steady partners.**

*“Steady partners” refer to boyfriends or husbands that mean you are not “single”, but not to partners who are simply sex buddies.*

*By “sex” we mean any kind of sex involving physical contact with another person, including oral sex and mutual masturbation.*

**20. In the last 6 months, how many male *steady* partners have you had sex with? (If you are not sure, please give an estimation)**

Number of male steady partners (0 if none) |\_\_|\_\_|\_\_|

I prefer not to answer  999

**21. In the last 6 months, how many male *steady* partners have you had anal intercourse with? (If you are not sure, please give an estimation)**

Number of male steady partners (0 if none) |\_\_|\_\_|\_\_|

I prefer not to answer  999

**22. In the last 6 months, how many male *steady* partners have you had unprotected (without condom) anal intercourse with? (If you are not sure, please give an estimation)**

Number of male steady partners (0 if none) |\_\_|\_\_|\_\_|

I prefer not to answer  999

**23. In the last 6 months, how many of those you had unprotected (without condom) anal intercourse with were? (If you are not sure, please give an estimation)**

HIV positive (0 if none) |\_\_|\_\_|\_\_|

With unknown HIV status (0 if none) |\_\_|\_\_|\_\_|

HIV negative (0 if none) |\_\_|\_\_|\_\_|

I prefer not to answer  999

**24. In the last 6 months, how many female partners (non-steady and steady) have you had sex with? (any kind of sex; if you are not sure, please give an estimation.)**

Number of female partners (0 if none) |\_\_|\_\_|\_\_| ➔ If NONE, go to question 26

I prefer not to answer  999

**25. In the last 6 months, did you have any unprotected (without condom) anal or vaginal intercourse with a woman?**

Yes  1

No  2

I prefer not to answer  9

**From this point onwards, we would like you to focus on the last time you had anal intercourse with a male partner.**

**26. Last time you had anal intercourse with a male partner, who did you have it with?**

One steady partner  1

One non-steady partner  2

More partners at once (threesome, group sex, etc.)  3

I have never had anal intercourse  4

I prefer not to answer  9

**➔ Go to question 31**

**27. Last time you had anal intercourse, were you ...**

|                                                         | Yes                        | No                         | I prefer not to answer     |
|---------------------------------------------------------|----------------------------|----------------------------|----------------------------|
| a. _____ penetrated (fucked) <b>with</b> a condom?      | <input type="checkbox"/> 1 | <input type="checkbox"/> 2 | <input type="checkbox"/> 9 |
| b. _____ penetrating (fucking) <b>with</b> a condom?    | <input type="checkbox"/> 1 | <input type="checkbox"/> 2 | <input type="checkbox"/> 9 |
| c. _____ penetrated (fucked) <b>without</b> a condom?   | <input type="checkbox"/> 1 | <input type="checkbox"/> 2 | <input type="checkbox"/> 9 |
| d. _____ penetrating (fucking) <b>without</b> a condom? | <input type="checkbox"/> 1 | <input type="checkbox"/> 2 | <input type="checkbox"/> 9 |

**28. Last time you had anal intercourse, what did you think about your partner/s HIV status before having sex? (In case of multiple partners, tick as many as apply.)**

I thought he was HIV negative  1

I knew he was HIV negative  2

I thought he was HIV positive  3

I knew he was HIV positive  4

I knew he was unsure about his HIV status  5

I didn't have any thoughts about his HIV status  6

I do not remember  8

I prefer not to answer  9

**29. Last time you had anal intercourse, what did you tell your partners/s about your HIV status before having sex? (In case of multiple partners, tick as many as apply.)**

I told him I didn't know my HIV status  1

I told him I was HIV negative  2

I told him I was HIV positive  3

I said nothing about my HIV status  4

I told him I was unsure about my HIV status  5

I do not remember  8

I prefer not to answer  9

**30. Before or during your last anal sexual intercourse, did you use the following? (Please answer each item.)**

|                           | Yes                                   | No                                    | I prefer not to answer                |
|---------------------------|---------------------------------------|---------------------------------------|---------------------------------------|
| a. Alcohol                | <input type="checkbox"/> <sub>1</sub> | <input type="checkbox"/> <sub>2</sub> | <input type="checkbox"/> <sub>9</sub> |
| b. Poppers                | <input type="checkbox"/> <sub>1</sub> | <input type="checkbox"/> <sub>2</sub> | <input type="checkbox"/> <sub>9</sub> |
| c. Ecstasy                | <input type="checkbox"/> <sub>1</sub> | <input type="checkbox"/> <sub>2</sub> | <input type="checkbox"/> <sub>9</sub> |
| d. Viagra/Camagra/Cialis  | <input type="checkbox"/> <sub>1</sub> | <input type="checkbox"/> <sub>2</sub> | <input type="checkbox"/> <sub>9</sub> |
| e. Hashish/marijuana      | <input type="checkbox"/> <sub>1</sub> | <input type="checkbox"/> <sub>2</sub> | <input type="checkbox"/> <sub>9</sub> |
| f. Cocaine                | <input type="checkbox"/> <sub>1</sub> | <input type="checkbox"/> <sub>2</sub> | <input type="checkbox"/> <sub>9</sub> |
| g. Amphetamine            | <input type="checkbox"/> <sub>1</sub> | <input type="checkbox"/> <sub>2</sub> | <input type="checkbox"/> <sub>9</sub> |
| h. GHB                    | <input type="checkbox"/> <sub>1</sub> | <input type="checkbox"/> <sub>2</sub> | <input type="checkbox"/> <sub>9</sub> |
| i. Other (specify: _____) | <input type="checkbox"/> <sub>1</sub> | <input type="checkbox"/> <sub>2</sub> | <input type="checkbox"/> <sub>9</sub> |

**31. In which year did you have your last HIV test in order to detect your HIV-status? (Please give an approximate year if you do not remember the exact year.)**

Year |\_\_|\_\_|\_\_|\_\_|

I have never been tested <sub>8</sub>      ➔ Go to question 35

I prefer not to answer <sub>9</sub>      ➔ Go to question 35

**32. What was the result of your last HIV test?**

HIV positive (I have HIV) <sub>1</sub>

HIV negative (I do not have HIV) <sub>2</sub>

Indeterminate <sub>3</sub>

I did not get the result of the test <sub>4</sub>

I prefer not to answer <sub>9</sub>

} ➔ Go to question 35

**33. In case you are living with HIV: are you currently taking drugs for treatment for HIV (known as antiretroviral, ART, HAART)?**

Yes <sub>1</sub>

No <sub>2</sub>

I prefer not to answer <sub>9</sub>

**34. In case you are living with HIV: what was your last viral load?**

Undetectable <sub>1</sub>

Detectable <sub>2</sub>

I do not remember / I don't know / I didn't get the result of the test <sub>3</sub>

I prefer not to answer <sub>9</sub>



**35. Have you ever injected drugs?** (*Drugs injected for medical purposes or treatment of an illness do not count.*)

- Yes  1
- No  2
- I prefer not to answer  9

**36. How satisfied are you with your sex life?**

- Very satisfied  1
- Somewhat satisfied  2
- Somewhat unsatisfied  3
- Very unsatisfied  4
- I prefer not to answer  9

**THANK YOU FOR YOUR KIND COLLABORATION!**

**PLEASE DO NOT COMPLETE THIS SECTION. FOR DATA COLLECTORS ONLY**

Date (dd-mm-yy) |\_\_|\_\_| - |\_\_|\_\_| - |\_\_|\_\_|\_\_|\_\_|

Time (hh:mm) \_\_ \_\_: \_\_ \_\_

Location \_\_\_\_\_

Interviewer's code |\_\_|\_\_|\_\_|

**bar code  
tag  
here**
